# Supplementary material for: ADL-dependency, D-Dimers, LDH and absence of anticoagulation are independently associated with one-month mortality in older inpatients with Covid-19
Source: publisher site journal article supplement (doi:10.18632/aging.103583), 2020-06-23
Supplement: Supplementary file [file aging-v12i12-103583-supplementary-material-SD1.pdf]

## SUPPLEMENTARY TABLES

**Supplementary Table 1. The Cumulative Illness Rating Scale for Geriatrics (CIRS(G)) [15].**

| Disease                              | Severity |   |   |   |   |
|--------------------------------------|----------|---|---|---|---|
|                                      | 0        | 1 | 2 | 3 | 4 |
| Heart                                |          |   |   |   |   |
| Vascular (including hypertension)    |          |   |   |   |   |
| Hematopoietic                        |          |   |   |   |   |
| Respiratory                          |          |   |   |   |   |
| Eyes, ears, nose, throat, and larynx |          |   |   |   |   |
| Upper Gastrointestinal               |          |   |   |   |   |
| Lower Gastrointestinal               |          |   |   |   |   |
| Liver, pancreas, and biliary         |          |   |   |   |   |
| Renal                                |          |   |   |   |   |
| Genitourinary                        |          |   |   |   |   |
| Musculoskeletal and skin             |          |   |   |   |   |
| Neurologic                           |          |   |   |   |   |
| Endocrine and breast                 |          |   |   |   |   |
| Psychiatric illness                  |          |   |   |   |   |
| <b>Total (0-56)</b>                  |          |   |   |   |   |

**Supplementary Table 2. Score for Activities of Daily Living (ADL) [16].**

| Questions            | Points       |                    |                   |
|----------------------|--------------|--------------------|-------------------|
|                      | Does alone 1 | Does with help 0.5 | Cannot do alone 0 |
| Washing              |              |                    |                   |
| Getting dressed      |              |                    |                   |
| Moving about indoors |              |                    |                   |
| Going to the toilet  |              |                    |                   |
| Eating               |              |                    |                   |
| Continence           |              |                    |                   |

**Scoring:**

Scores range from 0 to 6.

Total score  $\leq 5/6$  indicates ADL-dependency.

**Supplementary Table 3. The mini Geriatric Depression Scale (mini-GDS) [20].**

| Questions                        | Points |    |
|----------------------------------|--------|----|
|                                  | Yes    | No |
| Do you feel discouraged and sad? | 1      | 0  |
| Do you feel your life is empty?  | 1      | 0  |
| Are you happy most of the time?  | 0      | 1  |
| Do you feel hopeless?            | 1      | 0  |

**Scoring:**

Score ranges from 0 to 4.

Total score  $\geq 1/4$  indicates depressed mood.
